# Supplementary material
Source: bioRxiv or medRxiv preprint supplement (https://www.biorxiv.org/highwire/filestream/60229/field_highwire_adjunct_files/4/197855-3.pdf)

Shannon Diversity ( $H'$ )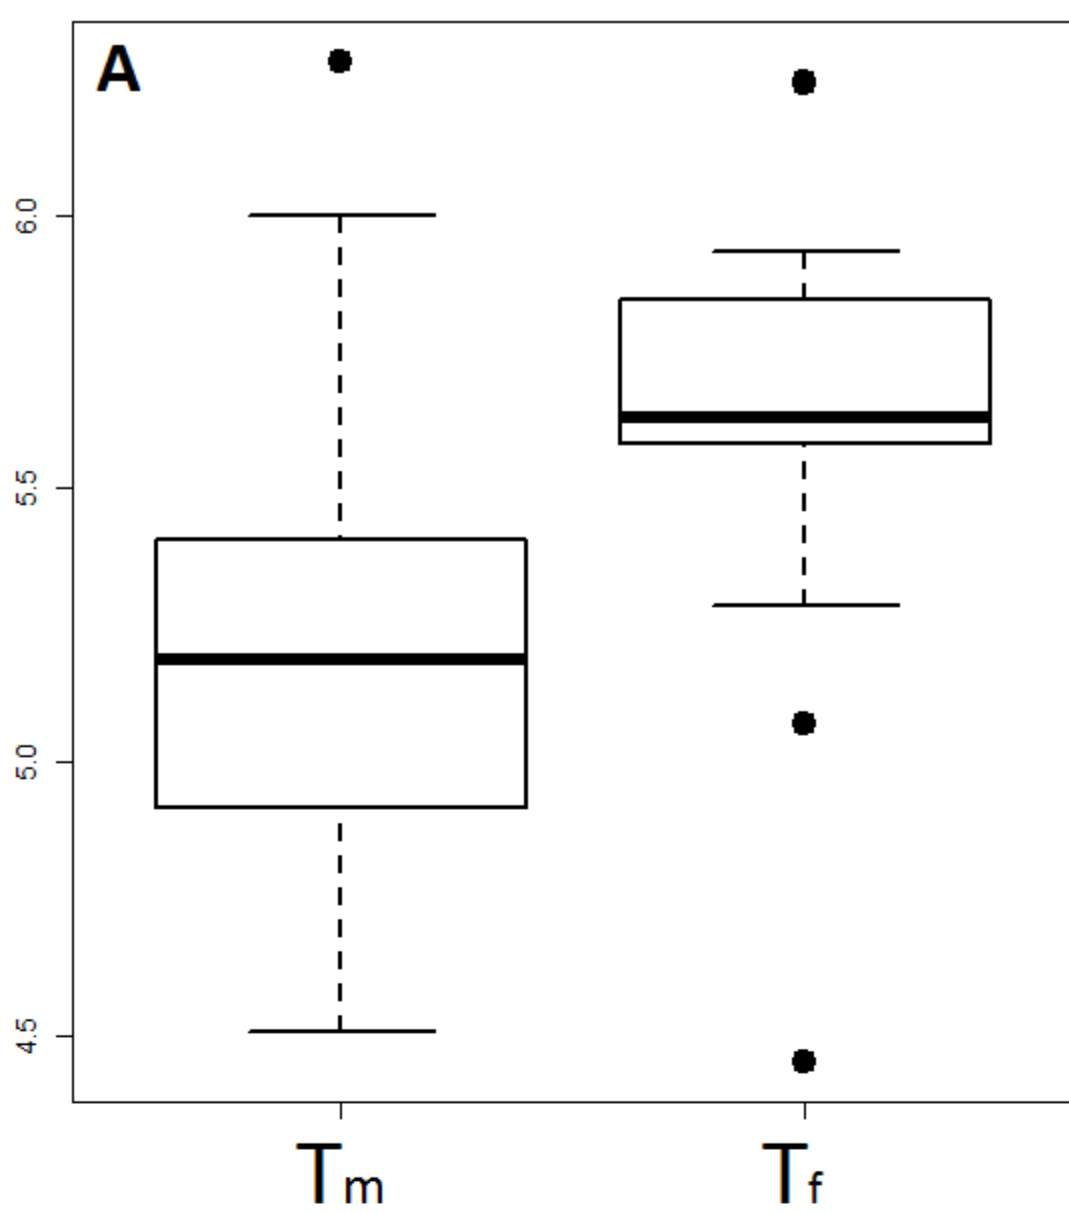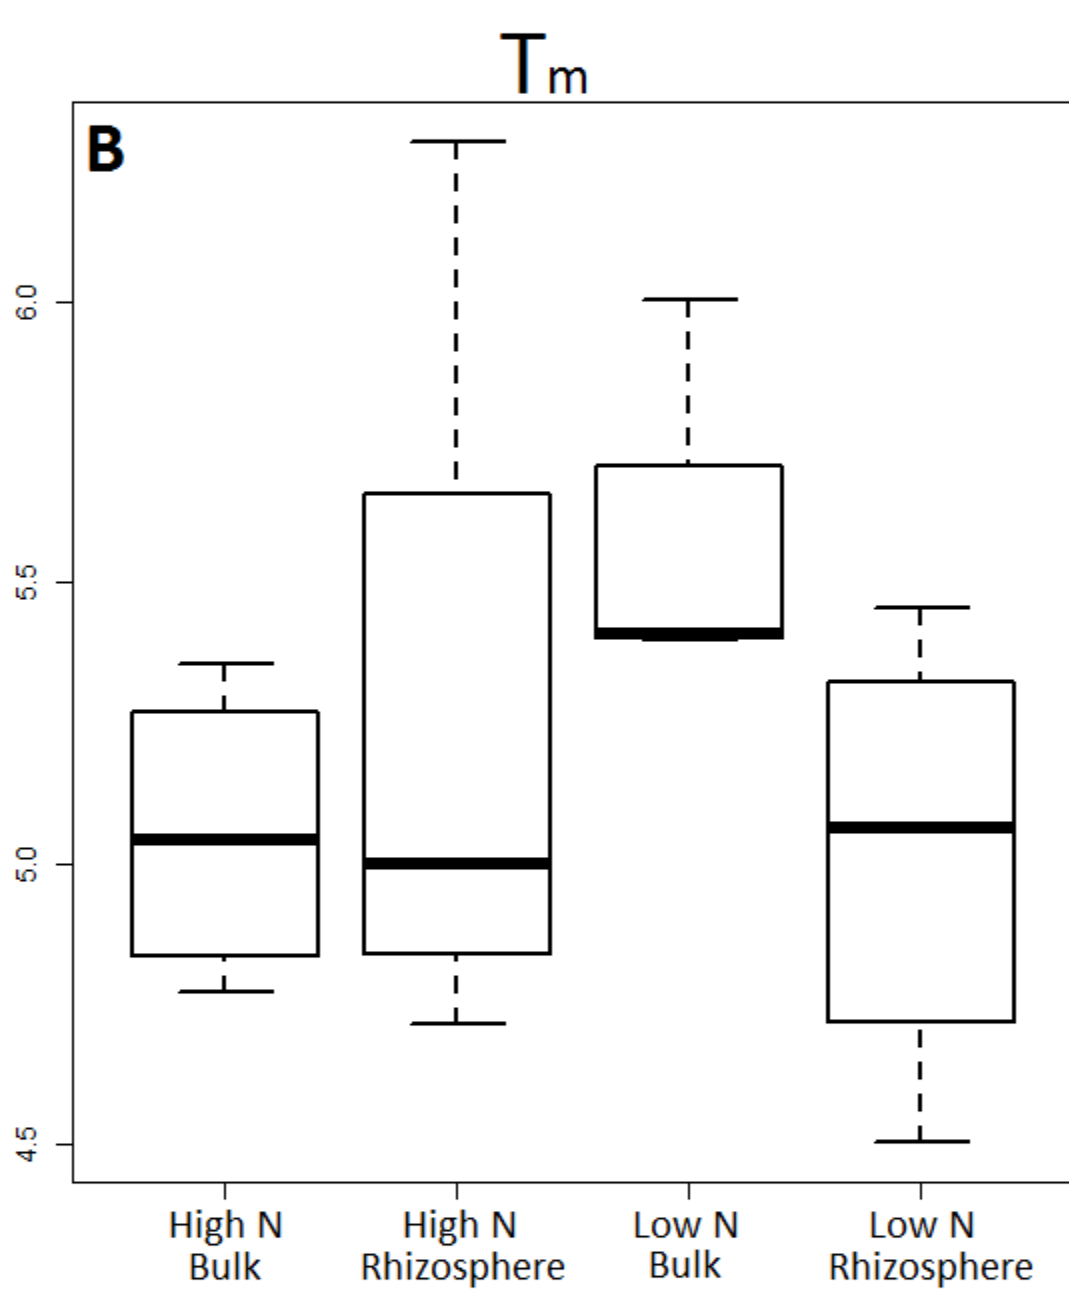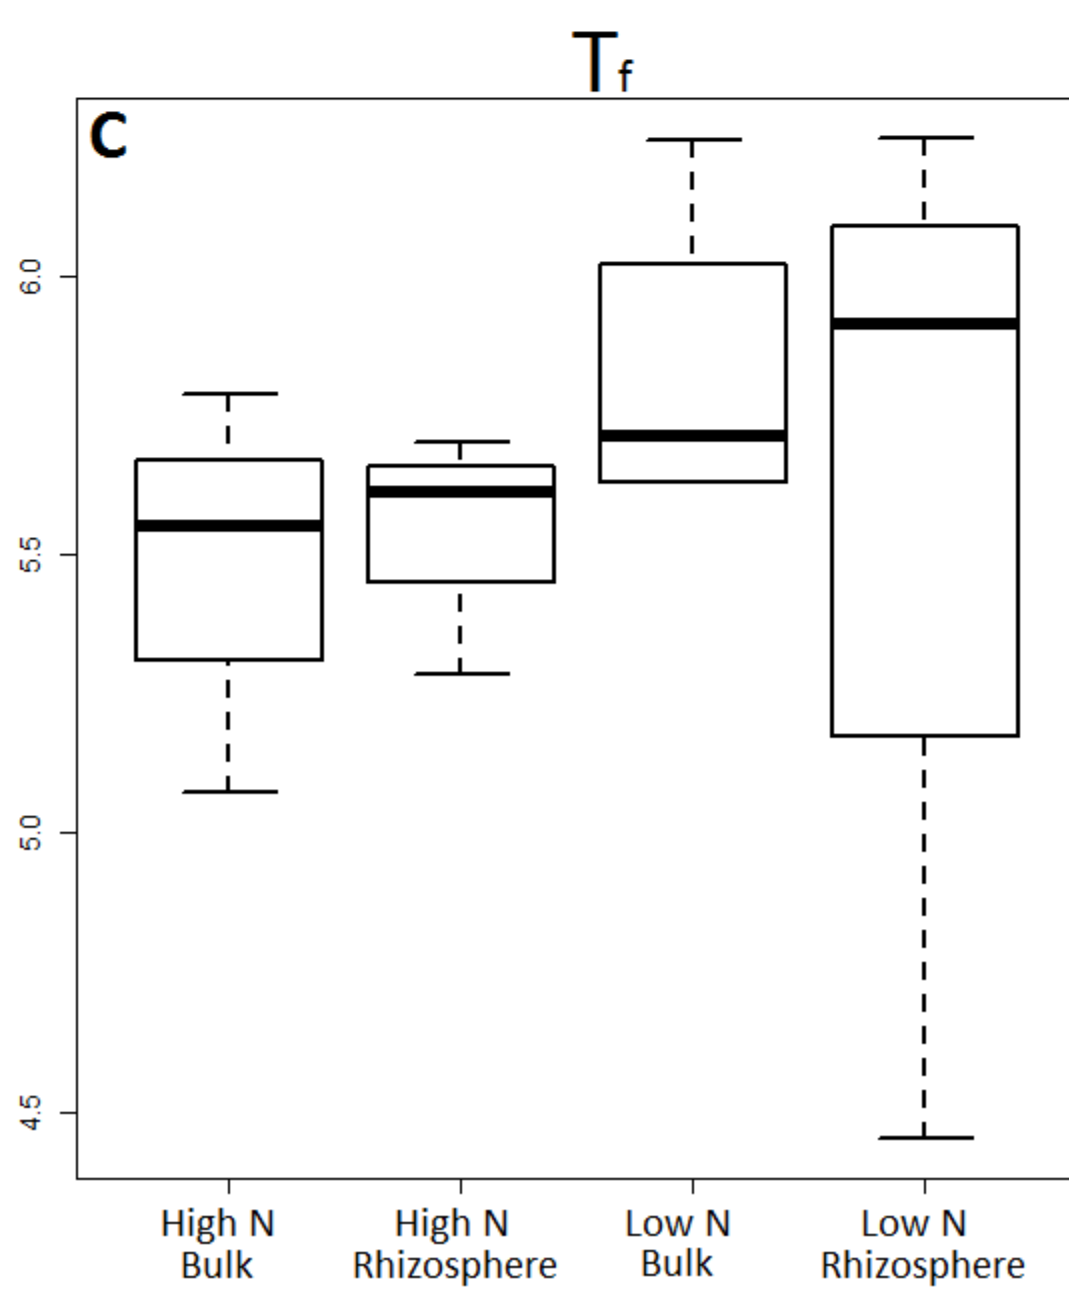

Supplement: Supplementary file [file 197855-3.pdf]
